# Supplementary material for: Amyloid beta 42 alters cardiac metabolism and impairs cardiac function in male mice with obesity
Source: PubMed Central journal article supplement (PMC10789867; doi:10.1038/s41467-023-44520-4), 2024-01-15
Supplement: 41467_2023_44520_MOESM1_ESM.pdf [file 41467_2023_44520_MOESM1_ESM.pdf]

## Supplementary Information for

### Amyloid beta 42 alters cardiac metabolism and impairs cardiac function in obese male mice

Liam G Hall<sup>1,2,10</sup>, Juliane K. Czechor<sup>1,3,10</sup>, Timothy Connor<sup>1</sup>, Javier Botella<sup>1</sup>, Kirstie A. De Jong<sup>1,4</sup>, Mark C. Renton<sup>5</sup>, Amanda J. Genders<sup>1,6</sup>, Kylie Venardos<sup>1</sup>, Sheree D. Martin<sup>1</sup>, Simon T. Bond<sup>1,7</sup>, Kathryn Aston-Mourney<sup>1</sup>, Kirsten F. Howlett<sup>5</sup>, James A Campbell<sup>8</sup>, Greg R. Collier<sup>8</sup>, Ken R. Walder<sup>1</sup>, Matthew McKenzie<sup>9</sup>, Mark Ziemann<sup>9</sup>, Sean L. McGee<sup>1,8</sup>

<sup>1</sup>Institute for Mental and Physical Health and Clinical Translation, Metabolic Research Unit, School of Medicine, Deakin University, Geelong, Australia.

<sup>2</sup>Department of Cellular and Physiological Sciences, Faculty of Medicine, The University of British Columbia, Vancouver, Canada.

<sup>3</sup>Becton Dickinson GmbH, Medical Affairs, 69126 Heidelberg, Germany.

<sup>4</sup>Institute of Experimental Cardiovascular Research, University Medical Centre Hamburg-Eppendorf, Hamburg, Germany.

<sup>5</sup>Institute for Physical Activity and Nutrition, School of Exercise and Nutrition Sciences, Deakin University, Geelong, Australia.

<sup>6</sup>Department of Nutrition, Dietetics and Food, School of Clinical Sciences and Victorian Heart Institute, Monash University, Melbourne, Australia

<sup>7</sup>Baker Heart and Diabetes Institute, Melbourne, Australia.

<sup>8</sup>Ambetex Pty Ltd, Geelong, Australia.

<sup>9</sup>School of Life and Environmental Science, Deakin University, Geelong, Australia.

<sup>10</sup>These authors contributed equally.

This document contains 5 data tables and 7 data figures.

Corresponding author:

Professor Sean L. McGee  
Metabolic Remodelling Laboratory  
Metabolic Research Unit  
School of Medicine  
Deakin University, Waurn Ponds, Australia, 3216  
Ph: +61 3 5227 2519  
Fax: +61 3 5227 2945  
Email: sean.mcgee@deakin.edu.au

**Supplementary Table 1**

| <b>Parameter</b>                  | <b>ScrA<math>\beta</math><sub>42</sub></b> | <b>A<math>\beta</math><sub>42</sub></b> | <b>P value</b> |
|-----------------------------------|--------------------------------------------|-----------------------------------------|----------------|
| Peak aortic flow (cm/sec)         | 61.9 $\pm$ 3.8                             | 58.7 $\pm$ 1.1                          | 0.481          |
| Ejection time (msec)              | 52.5 $\pm$ 1.6                             | 50.3 $\pm$ 2.0                          | 0.411          |
| Heart rate (bpm)                  | 386 $\pm$ 24                               | 397 $\pm$ 18                            | 0.736          |
| Peak E wave (cm/sec)              | 58.9 $\pm$ 4.9                             | 60.6 $\pm$ 2.7                          | 0.770          |
| Peak A wave (cm/sec)              | 27.4 $\pm$ 2.4                             | 32.0 $\pm$ 0.6                          | 0.123          |
| IVSd (cm)                         | 0.126 $\pm$ 0.007                          | 0.121 $\pm$ 0.006                       | 0.604          |
| LVIDd (cm)                        | 0.346 $\pm$ 0.006                          | 0.346 $\pm$ 0.016                       | 0.974          |
| LVPWd (cm)                        | 0.108 $\pm$ 0.005                          | 0.116 $\pm$ 0.004                       | 0.155          |
| IVSs (cm)                         | 0.148 $\pm$ 0.007                          | 0.149 $\pm$ 0.006                       | 0.949          |
| LVIDs (cm)                        | 0.230 $\pm$ 0.003                          | 0.251 $\pm$ 0.013                       | 0.151          |
| LVPWs (cm)                        | 0.132 $\pm$ 0.006                          | 0.148 $\pm$ 0.007                       | 0.100          |
| Estimated LV mass (mg)            | 163 $\pm$ 13                               | 168 $\pm$ 14                            | 0.822          |
| Heart weight/tibia length (mg/mm) | 7.11 $\pm$ 0.09                            | 7.19 $\pm$ 0.17                         | 0.751          |

**Supplementary Table 1: Cardiac function and morphology in mice administered ScrA $\beta$ <sub>42</sub> or A $\beta$ <sub>42</sub>.** IVSd, intraventricular septum thickness at diastole; LVIDd, left ventricular internal diameter at diastole; LVPWd, left ventricular posterior wall thickness at diastole; IVSs, intraventricular septum thickness at systole; LVIDs, left ventricular internal diameter at systole; LVPWs, left ventricular posterior wall thickness at systole. Data are mean  $\pm$  SEM, n =10 mice/group. Groups compared by unpaired t-test, two-tailed. Source data are provided in the Source Data file.

## Supplementary Table 2

| Parameter                         | ScrA $\beta_{40}$ | A $\beta_{40}$    | P value |
|-----------------------------------|-------------------|-------------------|---------|
| Peak aortic flow (cm/sec)         | 60.4 $\pm$ 4.2    | 66.2 $\pm$ 5.1    | 0.391   |
| Ejection time (msec)              | 59.3 $\pm$ 1.4    | 61.5 $\pm$ 1.2    | 0.233   |
| Heart rate (bpm)                  | 416 $\pm$ 12      | 384 $\pm$ 10      | 0.060   |
| Peak E wave (cm/sec)              | 57.1 $\pm$ 3.6    | 58.1 $\pm$ 4.4    | 0.862   |
| Peak A wave (cm/sec)              | 35.9 $\pm$ 1.8    | 32.4 $\pm$ 1.8    | 0.193   |
| E:A ratio                         | 1.54 $\pm$ 0.08   | 1.73 $\pm$ 0.10   | 0.153   |
| Deceleration time (msec)          | 0.032 $\pm$ 0.001 | 0.032 $\pm$ 0.001 | 0.939   |
| IVSd (cm)                         | 0.125 $\pm$ 0.005 | 0.120 $\pm$ 0.006 | 0.498   |
| LVIDd (cm)                        | 0.340 $\pm$ 0.010 | 0.350 $\pm$ 0.012 | 0.528   |
| LVPWd (cm)                        | 0.125 $\pm$ 0.004 | 0.128 $\pm$ 0.003 | 0.533   |
| IVSs (cm)                         | 0.178 $\pm$ 0.007 | 0.174 $\pm$ 0.007 | 0.697   |
| LVIDs (cm)                        | 0.225 $\pm$ 0.012 | 0.226 $\pm$ 0.013 | 0.981   |
| LVPWs (cm)                        | 0.141 $\pm$ 0.004 | 0.152 $\pm$ 0.005 | 0.094   |
| Ejection fraction (%)             | 71.5 $\pm$ 2.6    | 73.2 $\pm$ 2.1    | 0.602   |
| Fractional shortening (%)         | 35.9 $\pm$ 2.2    | 36.2 $\pm$ 1.7    | 0.905   |
| Estimated LV mass (mg)            | 217 $\pm$ 15      | 204 $\pm$ 11      | 0.502   |
| Heart weight/tibia length (mg/mm) | 9.60 $\pm$ 0.42   | 8.78 $\pm$ 0.24   | 0.112   |

**Supplementary Table 2: Cardiac function and morphology in mice administered ScrA $\beta_{40}$  or A $\beta_{40}$ .** IVSd, intraventricular septum thickness at diastole; LVIDd, left ventricular internal diameter at diastole; LVPWd, left ventricular posterior wall thickness at diastole; IVSs, intraventricular septum thickness at systole; LVIDs, left ventricular internal diameter at systole; LVPWs, left ventricular posterior wall thickness at systole. Data are mean  $\pm$  SEM, n =12 mice/group. Groups compared by unpaired t-test, two-tailed. Source data are provided in the Source Data file.

**Supplementary Table 3**

| Parameter                 | Control       |               | 3D6           |               | 2-way RM ANOVA P value |        |        |
|---------------------------|---------------|---------------|---------------|---------------|------------------------|--------|--------|
|                           | Pre           | Post          | Pre           | Post          | Tx                     | Time   | Int.   |
| Peak aortic flow (cm/sec) | 72.2 ± 6.9    | 67.9 ± 4.7    | 67.0 ± 6.0    | 65.3 ± 4.7    | 0.5022                 | 0.5975 | 0.8217 |
| Ejection time (msec)      | 48.5 ± 2.3    | 54.0 ± 2.2    | 49.4 ± 3.2    | 52.5 ± 2.4    | 0.9121                 | 0.0969 | 0.6365 |
| Heart rate (bpm)          | 455 ± 22      | 453 ± 19      | 437 ± 17      | 475 ± 22      | 0.9328                 | 0.3786 | 0.3177 |
| Peak E wave (cm/sec)      | 48.3 ± 2.7    | 51.0 ± 3.8    | 51.1 ± 4.6    | 49.4 ± 3.3    | 0.8070                 | 0.7936 | 0.3434 |
| Peak A wave (cm/sec)      | 28.7 ± 1.6    | 37.4 ± 3.5    | 32.7 ± 3.1    | 35.0 ± 2.8    | 0.9631                 | 0.1365 | 0.1724 |
| E:A ratio                 | 1.69 ± 0.08   | 1.41 ± 0.04   | 1.60 ± 0.09   | 1.32 ± 0.04   | 0.1654                 | 0.0056 | 0.8433 |
| IVSd (cm)                 | 0.116 ± 0.003 | 0.128 ± 0.006 | 0.130 ± 0.006 | 0.129 ± 0.006 | 0.2207                 | 0.1432 | 0.0829 |
| LVIDd (cm)                | 0.272 ± 0.012 | 0.307 ± 0.009 | 0.272 ± 0.010 | 0.293 ± 0.013 | 0.3505                 | 0.0072 | 0.7772 |
| LVPWd (cm)                | 0.120 ± 0.006 | 0.135 ± 0.008 | 0.130 ± 0.007 | 0.131 ± 0.005 | 0.9798                 | 0.0013 | 0.2343 |
| IVSs (cm)                 | 0.165 ± 0.002 | 0.174 ± 0.006 | 0.168 ± 0.007 | 0.166 ± 0.006 | 0.6910                 | 0.5835 | 0.3740 |
| LVIDs (cm)                | 0.175 ± 0.012 | 0.189 ± 0.010 | 0.177 ± 0.011 | 0.195 ± 0.012 | 0.7513                 | 0.1800 | 0.8458 |
| LVPWs (cm)                | 0.137 ± 0.006 | 0.158 ± 0.009 | 0.146 ± 0.005 | 0.148 ± 0.010 | 0.9417                 | 0.1486 | 0.2658 |
| Ejection fraction (%)     | 75.3 ± 1.5    | 75.0 ± 1.8    | 76.1 ± 1.8    | 69.5 ± 2.8    | 0.1797                 | 0.3923 | 0.5001 |
| Fractional shortening (%) | 37.7 ± 1.3    | 37.6 ± 1.6    | 37.3 ± 1.9    | 34.6 ± 2.4    | 0.7223                 | 0.1921 | 0.1953 |

**Supplementary Table 3: Cardiac function and morphology in mice fed a high fat diet and administered control or 3D6 antibodies.** IVSd, intraventricular septum thickness at diastole; LVIDd, left ventricular internal diameter at diastole; LVPWd, left ventricular posterior wall thickness at diastole; IVSs, intraventricular septum thickness at systole; LVIDs, left ventricular internal diameter at systole; LVPWs, left ventricular posterior wall thickness at systole. Data are mean ± SEM, n =12 mice/group. Groups compared by two-way repeated measures ANOVA. Tx, treatment; Int, interaction. Source data are provided in the Source Data file.

**Supplementary Table 4**

|                 | Chow control  |               |               | HFD control   |               |               | HFD 3D6       |               |               | Mixed effects model <i>P</i> value |          |        |
|-----------------|---------------|---------------|---------------|---------------|---------------|---------------|---------------|---------------|---------------|------------------------------------|----------|--------|
|                 | Base-line     | Pre-treat     | Post-treat    | Base-line     | Pre-treat     | Post-treat    | Base-line     | Pre-treat     | Post-treat    | Tx                                 | Time     | Int.   |
| PAF (cm/sec)    | 57.8 ± 2.7    | 59.1 ± 4.2    | 61.3 ± 2.6    | 60.1 ± 6.3    | 59.3 ± 3.2    | 67.7 ± 5.1    | 58.7 ± 4.0    | 64.1 ± 3.0    | 71.8 ± 2.5    | 0.0955                             | 0.0067   | 0.5443 |
| ET (msec)       | 42.3 ± 1.9    | 42.3 ± 2.2    | 46.8 ± 2.0    | 41.2 ± 1.2    | 49.2 ± 2.4    | 43.8 ± 3.2    | 44.5 ± 1.5    | 46.2 ± 1.5    | 45.3 ± 2.6    | 0.6138                             | 0.0318   | 0.5453 |
| HR (bpm)        | 468 ± 18      | 491 ± 17      | 510 ± 23      | 441 ± 4       | 501 ± 9       | 556 ± 23      | 462 ± 10      | 503 ± 12      | 572 ± 12      | 0.3321                             | < 0.0001 | 0.3321 |
| Peak E (cm/sec) | 42.3 ± 3.5    | 51.1 ± 3.8    | 50.0 ± 4.1    | 45.2 ± 4.2    | 58.3 ± 4.1    | 53.0 ± 2.6    | 41.6 ± 1.4    | 52.3 ± 2.8    | 63.8 ± 3.5    | 0.2964                             | 0.0003   | 0.2945 |
| Peak A (cm/sec) | 27.3 ± 2.2    | 33.5 ± 2.7    | 35.0 ± 1.9    | 24.4 ± 1.2    | 34.4 ± 2.4    | 36.2 ± 2.8    | 28.7 ± 1.7    | 32.3 ± 2.2    | 46.7 ± 3.8    | 0.0852                             | < 0.0001 | 0.0592 |
| E:A ratio       | 1.62 ± 0.08   | 1.59 ± 0.03   | 1.57 ± 0.03   | 1.65 ± 0.05   | 1.67 ± 0.06   | 1.45 ± 0.09   | 1.52 ± 0.05   | 1.56 ± 0.07   | 1.41 ± 0.06   | 0.2417                             | 0.1167   | 0.8675 |
| IVSd (cm)       | 0.147 ± 0.002 | 0.109 ± 0.005 | 0.118 ± 0.004 | 0.135 ± 0.006 | 0.114 ± 0.003 | 0.129 ± 0.005 | 0.137 ± 0.008 | 0.125 ± 0.005 | 0.122 ± 0.003 | 0.7234                             | < 0.0001 | 0.0335 |
| LVIDd (cm)      | 0.248 ± 0.011 | 0.314 ± 0.014 | 0.293 ± 0.014 | 0.268 ± 0.005 | 0.311 ± 0.015 | 0.308 ± 0.015 | 0.263 ± 0.014 | 0.303 ± 0.014 | 0.281 ± 0.009 | 0.4968                             | 0.0001   | 0.6252 |
| LVPWd (cm)      | 0.156 ± 0.008 | 0.136 ± 0.008 | 0.125 ± 0.008 | 0.142 ± 0.005 | 0.152 ± 0.007 | 0.137 ± 0.009 | 0.134 ± 0.007 | 0.147 ± 0.008 | 0.144 ± 0.007 | 0.6857                             | 0.0577   | 0.0241 |
| IVSs (cm)       | 0.189 ± 0.008 | 0.158 ± 0.006 | 0.162 ± 0.006 | 0.175 ± 0.008 | 0.169 ± 0.005 | 0.178 ± 0.006 | 0.167 ± 0.009 | 0.169 ± 0.003 | 0.173 ± 0.004 | 0.9053                             | 0.0876   | 0.0313 |
| LVIDs (cm)      | 0.160 ± 0.007 | 0.193 ± 0.013 | 0.185 ± 0.015 | 0.192 ± 0.010 | 0.192 ± 0.016 | 0.185 ± 0.015 | 0.186 ± 0.012 | 0.188 ± 0.014 | 0.172 ± 0.010 | 0.4420                             | 0.6350   | 0.6135 |
| LVPWs (cm)      | 0.171 ± 0.005 | 0.156 ± 0.007 | 0.141 ± 0.008 | 0.160 ± 0.006 | 0.174 ± 0.010 | 0.166 ± 0.011 | 0.149 ± 0.009 | 0.167 ± 0.008 | 0.157 ± 0.008 | 0.2567                             | 0.2109   | 0.0370 |
| EF (%)          | 71.0 ± 1.9    | 76.1 ± 2.1    | 74.1 ± 2.9    | 67.3 ± 2.6    | 74.9 ± 3.0    | 78.2 ± 2.2    | 66.2 ± 1.6    | 74.3 ± 3.1    | 76.7 ± 2.2    | 0.8585                             | 0.004    | 0.5063 |
| FS (%)          | 34.0 ± 1.4    | 39.0 ± 2.1    | 37.5 ± 2.6    | 31.8 ± 1.8    | 39.5 ± 3.0    | 40.9 ± 2.3    | 30.0 ± 0.9    | 38.3 ± 2.9    | 39.4 ± 2.0    | 0.9689                             | 0.0005   | 0.6390 |
| LV mass (mg)    | 152 ± 7       | 153 ± 9       | 136 ± 3       | 161 ± 10      | 164 ± 5       | 161 ± 8       | 145 ± 14      | 166 ± 6       | 153 ± 5       | 0.0925                             | 0.1080   | 0.1357 |

**Supplementary Table 4: Cardiac function and morphology in mice fed chow or high fat diet and administered control or 3D6 antibodies.** PAF, peak aortic flow; ET, ejection time; HR, heart rate; IVSd, intraventricular septum thickness at diastole; LVIDd, left ventricular internal diameter at diastole; LVPWd, left ventricular posterior wall thickness at diastole; IVSs, intraventricular septum thickness at systole; LVIDs, left ventricular internal diameter at systole; LVPWs, left ventricular posterior wall thickness at systole. EF, ejection fraction; FS, fractional shortening. Data are mean ± SEM, n =12 mice/group. Groups compared by mixed effects model. Tx, treatment; Int, interaction. Source data are provided in the Source Data file.

**Supplementary Table 5**

| Pathway                                      | setSize | p<br>MANOVA | p.adjust<br>MANOVA | s.dist | s.A $\beta$ <sub>42</sub> | s.3D6  | p.A $\beta$ <sub>42</sub> | p.3D6   |
|----------------------------------------------|---------|-------------|--------------------|--------|---------------------------|--------|---------------------------|---------|
| TCA cycle                                    | 22      | <0.0001     | 0.0004             | 0.608  | -0.350                    | 0.498  | 0.0045                    | <0.0001 |
| Pyruvate metabolism and TCA cycle            | 50      | <0.0001     | <0.0001            | 0.567  | -0.305                    | 0.478  | 0.0002                    | <0.0001 |
| Pyruvate metabolism                          | 26      | 0.0002      | 0.0030             | 0.484  | -0.246                    | 0.417  | 0.0301                    | 0.0002  |
| Mitochondrial biogenesis                     | 71      | 0.0009      | 0.0014             | 0.268  | -0.184                    | 0.196  | 0.0076                    | 0.0044  |
| Protein localisation                         | 141     | 0.0001      | 0.0004             | 0.215  | -0.146                    | 0.158  | 0.0028                    | 0.0012  |
| Neddylation                                  | 201     | <0.0001     | <0.0001            | 0.199  | -0.109                    | 0.166  | 0.0079                    | <0.0001 |
| Antigen processing                           | 262     | <0.0001     | <0.0001            | 0.197  | -0.075                    | 0.182  | 0.0380                    | <0.0001 |
| Autophagy                                    | 117     | 0.0037      | 0.0050             | 0.188  | -0.127                    | 0.139  | 0.0178                    | 0.0097  |
| Chromatin modifying enzymes                  | 188     | 0.0006      | 0.0011             | 0.171  | -0.111                    | 0.130  | 0.0002                    | 0.0022  |
| Chromatin organisation                       | 188     | 0.0006      | 0.0011             | 0.171  | -0.111                    | 0.130  | 0.0002                    | 0.0022  |
| Hemostasis                                   | 373     | <0.0001     | <0.0001            | 0.184  | 0.094                     | -0.157 | 0.0019                    | <0.0001 |
| Platelet activation                          | 187     | <0.0001     | <0.0001            | 0.214  | 0.098                     | -0.190 | 0.0208                    | <0.0001 |
| Elevated platelet cytosolic-Ca <sup>2+</sup> | 97      | 0.0002      | 0.0005             | 0.252  | 0.148                     | -0.203 | 0.0117                    | 0.0005  |
| Platelet degranulation                       | 93      | 0.0001      | 0.0003             | 0.269  | 0.158                     | -0.218 | 0.0084                    | 0.0003  |
| Chondroitin sulfate metabolism               | 40      | 0.0040      | 0.0050             | 0.319  | 0.205                     | -0.244 | 0.0076                    | 0.0044  |
| Kainate receptor activation                  | 20      | 0.0052      | 0.0060             | 0.439  | 0.339                     | -0.278 | 0.0086                    | 0.0314  |
| Basigin interactions                         | 18      | 0.0042      | 0.0291             | 0.473  | 0.343                     | -0.326 | 0.0118                    | 0.0168  |
| Thrombin signalling through PARs             | 21      | 0.0013      | 0.0116             | 0.480  | 0.336                     | -0.343 | 0.0076                    | 0.0065  |
| G $\beta$ $\chi$ signalling through BTK      | 11      | 0.0029      | 0.0021             | 0.508  | 0.371                     | -0.346 | 0.00331                   | 0.0468  |

**Supplementary Table 5: Reactome pathways reciprocally regulated in mice administered A $\beta$ <sub>42</sub> or 3D6 relative to their respective control groups, as determined by mitch.** MANOVA p-values (both unadjusted and adjusted for multiple comparison testing) are for pathways in two dimensions. s.dist is the enrichment score across two dimensions. s.A $\beta$ <sub>42</sub> and s.3D6 are the enrichment scores for the A $\beta$ <sub>42</sub> and 3D6 datasets respectively. p.A $\beta$ <sub>42</sub> and p.3D6 indicate the significance of the pathway in the A $\beta$ <sub>42</sub> and 3D6 datasets respectively and have been adjusted for multiple comparisons using the FDR method. Source data are provided in the Source Data file.

## Supplementary Figure 1

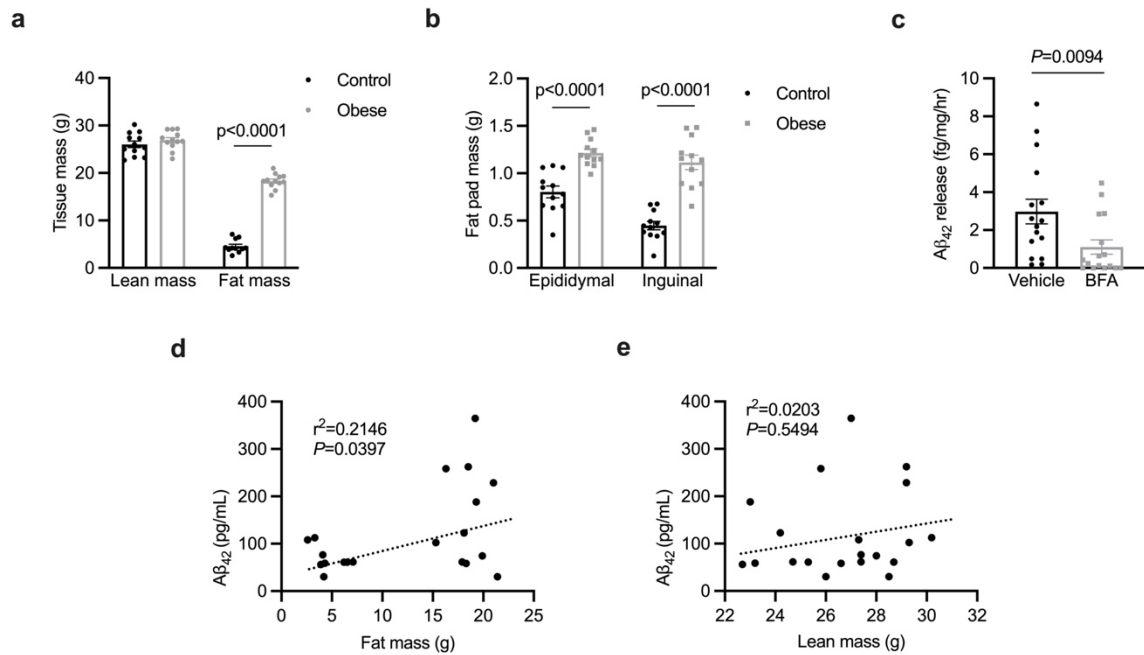

**Supplementary Figure 1:  $A\beta_{42}$  release by adipose tissue and body composition correlations with plasma  $A\beta_{42}$ .** **a**, lean and fat mass in control and obese mice ( $n=12/\text{group}$ ). **b**, fat pad mass in control and obese mice ( $n=12/\text{group}$ ). **c**, relative release of  $A\beta_{42}$  from adipose tissue exposed to vehicle or Brefeldin A (BFA; Mann-Whitney test,  $U=73$ ;  $n=16/\text{group}$ ). **d**, correlation between fat mass and plasma  $A\beta_{42}$  (Pearson's correlation coefficient test;  $n=20$  data points). **e**, Correlation between lean mass and plasma  $A\beta_{42}$  (Pearson's correlation coefficient test;  $n=20$  data points). All data are mean  $\pm$  SEM. Statistical tests are two-tailed. Source data are provided in the Source Data file.

## Supplementary Figure 2

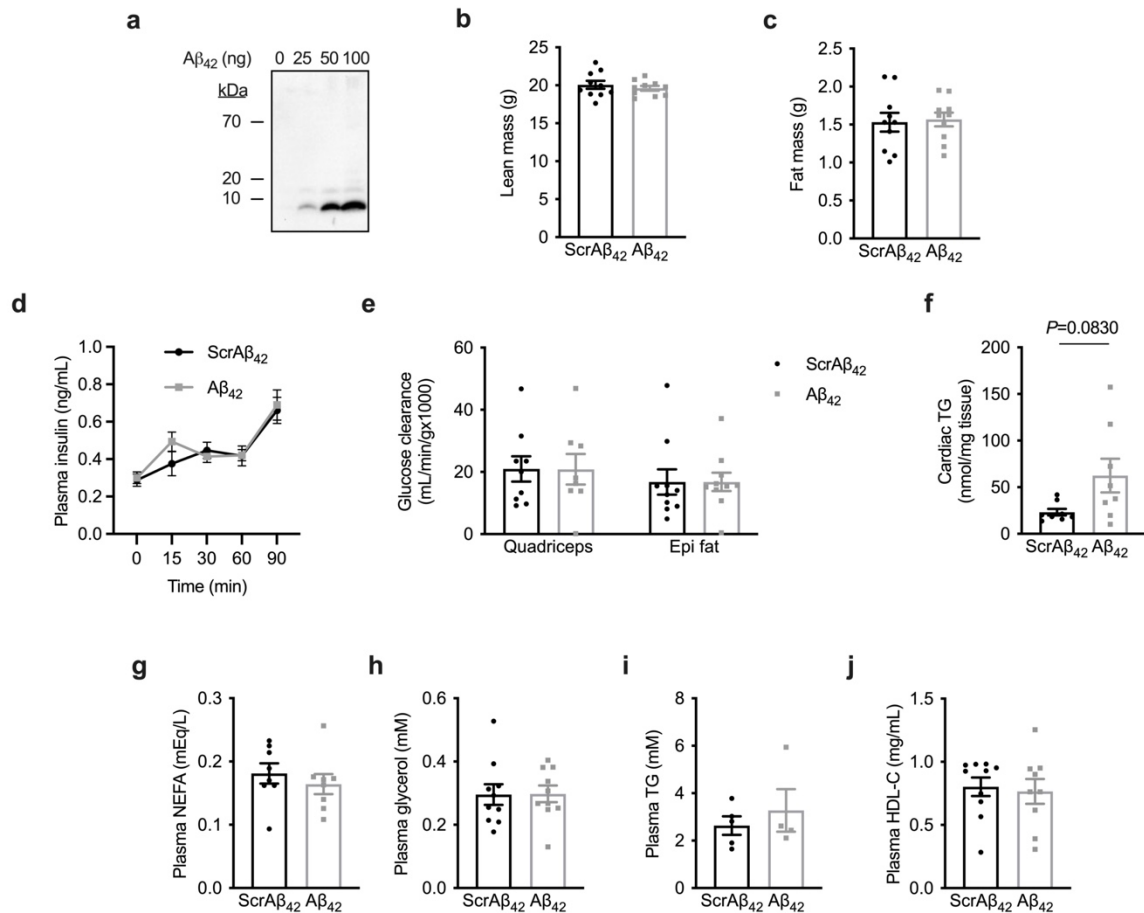

**Supplementary Figure 2: Characterisation of mice administered ScrA $\beta$ <sub>42</sub> or A $\beta$ <sub>42</sub>.** **a**, immunoblotting of increasing amounts of recombinant A $\beta$ <sub>42</sub> preparations. **b**, lean mass (n=10/group); **c**, fat mass (n=10/group); **d**, plasma insulin during a glucose tolerance test (n=9 and 10/group respectively); **e** glucose clearance by the quadriceps skeletal muscle (n=9 and 8/group respectively) and epididymal fat pad (n=10/group); **f**, <sup>14</sup>C-glucose incorporation into cardiac lipids (n=8/group); **g**, plasma non-esterified fatty acids (NEFA; n=8/group); **h**, plasma glycerol (n=10/group); **i**, plasma triglycerides (TG; n=5 and 4/group respectively), and; **j**, plasma high-density lipoprotein cholesterol (HDL-C; n=10 and 9/group respectively) in mice administered ScrA $\beta$ <sub>42</sub> or A $\beta$ <sub>42</sub>. All data are mean  $\pm$  SEM. Statistical tests are two-tailed. Source data are provided in the Source Data file.



### Supplementary Figure 3

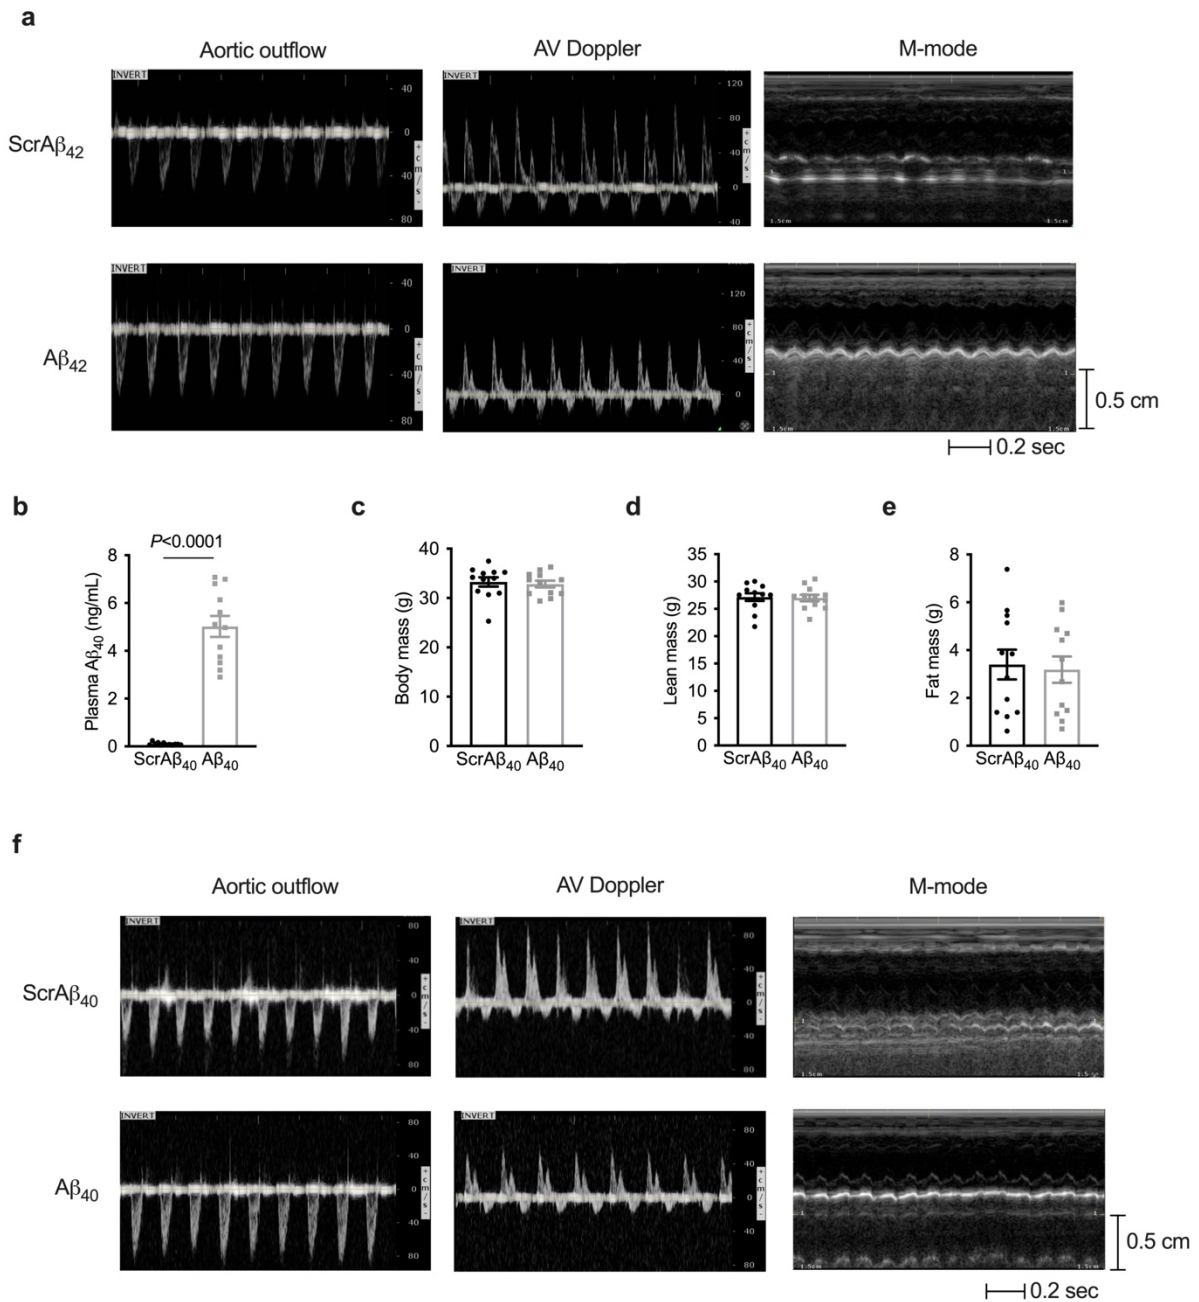

**Supplementary Figure 3: Characterisation of mice administered ScrA $\beta_{42}$  or A $\beta_{42}$  and ScrA $\beta_{40}$  or A $\beta_{40}$ .** **a**, representative echocardiography images of mice administered ScrA $\beta_{42}$  or A $\beta_{42}$ . **b**, plasma A $\beta_{40}$  60 min after A $\beta_{40}$  administration (n=12/group). **c**, body weight (n=12/group); **d**, lean mass (n=12/group); **e**, fat mass (n=12/group), and; **f**, representative echocardiography images in mice administered ScrA $\beta_{40}$  or A $\beta_{40}$ . All data are mean  $\pm$  SEM. Statistical tests are two-tailed. Source data are provided in the Source Data file.

## Supplementary Figure 4

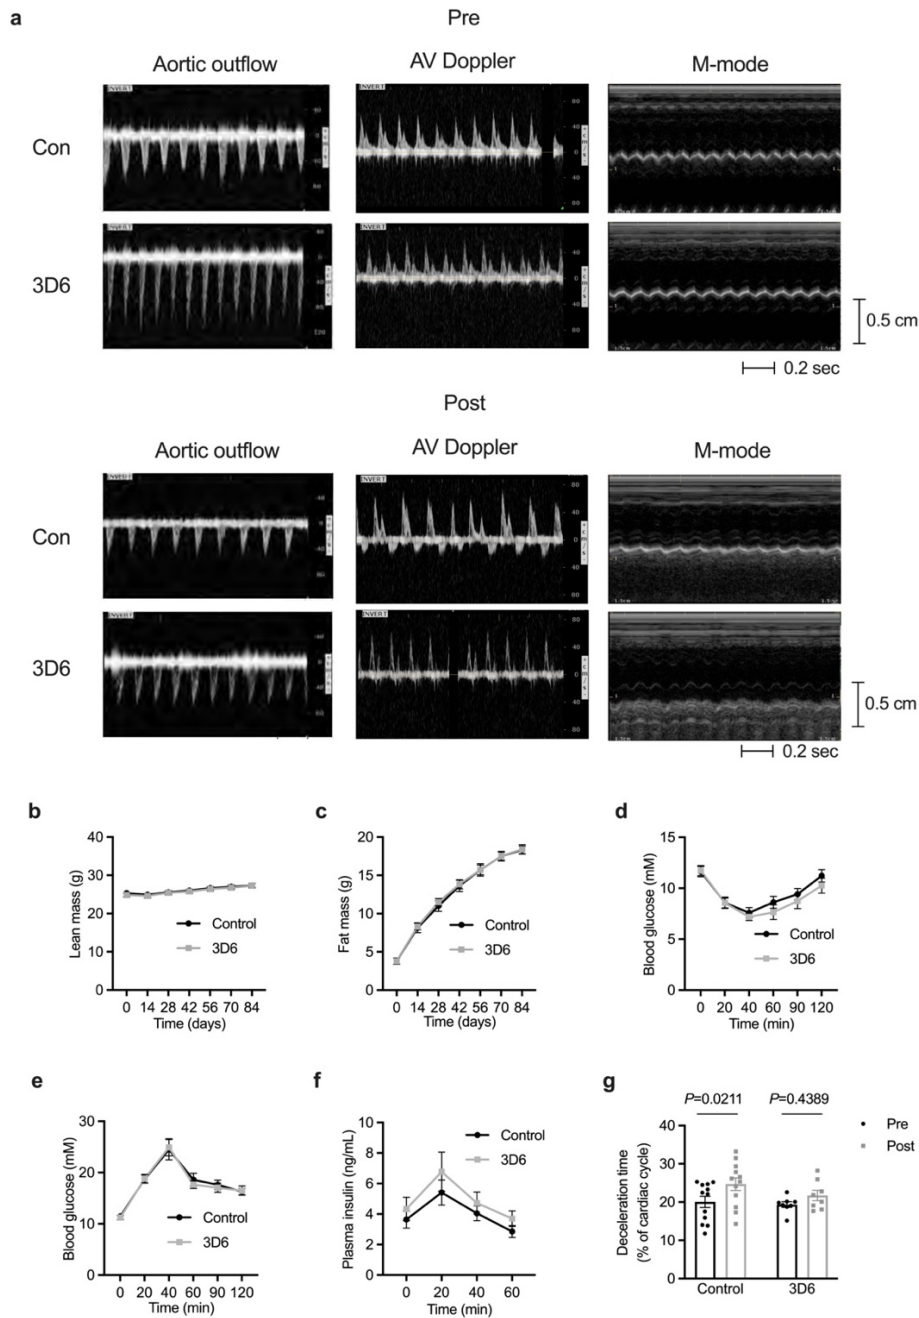

**Supplementary Figure 4: Characterisation of mice fed a high fat diet and administered control or 3D6 antibodies.** **a**, representative echocardiography images; **b**, lean mass (n=12/group); **c**, fat mass (n=12/group), **d**, blood glucose during the insulin tolerance test (n=12/group); **e**, blood glucose during the glucose tolerance test (n=11 and 12/group respectively); **f**, plasma insulin during the glucose tolerance test (n=9 and 10/group respectively), and; **g**, cardiac deceleration time expressed as a percentage of the cardiac cycle (mixed effects model (time  $P = 0.0140$ ,  $F(1,18) = 7.407$ ) with Sidak's repeated measures test  $P$ .adjusted; n=12 and 8/group respectively) pre- and post-treatment in mice fed a high fat diet and administered control and 3D6 antibodies. All data are mean  $\pm$  SEM. Statistical tests are two-tailed. Source data are provided in the Source Data file.

## Supplementary Figure 5

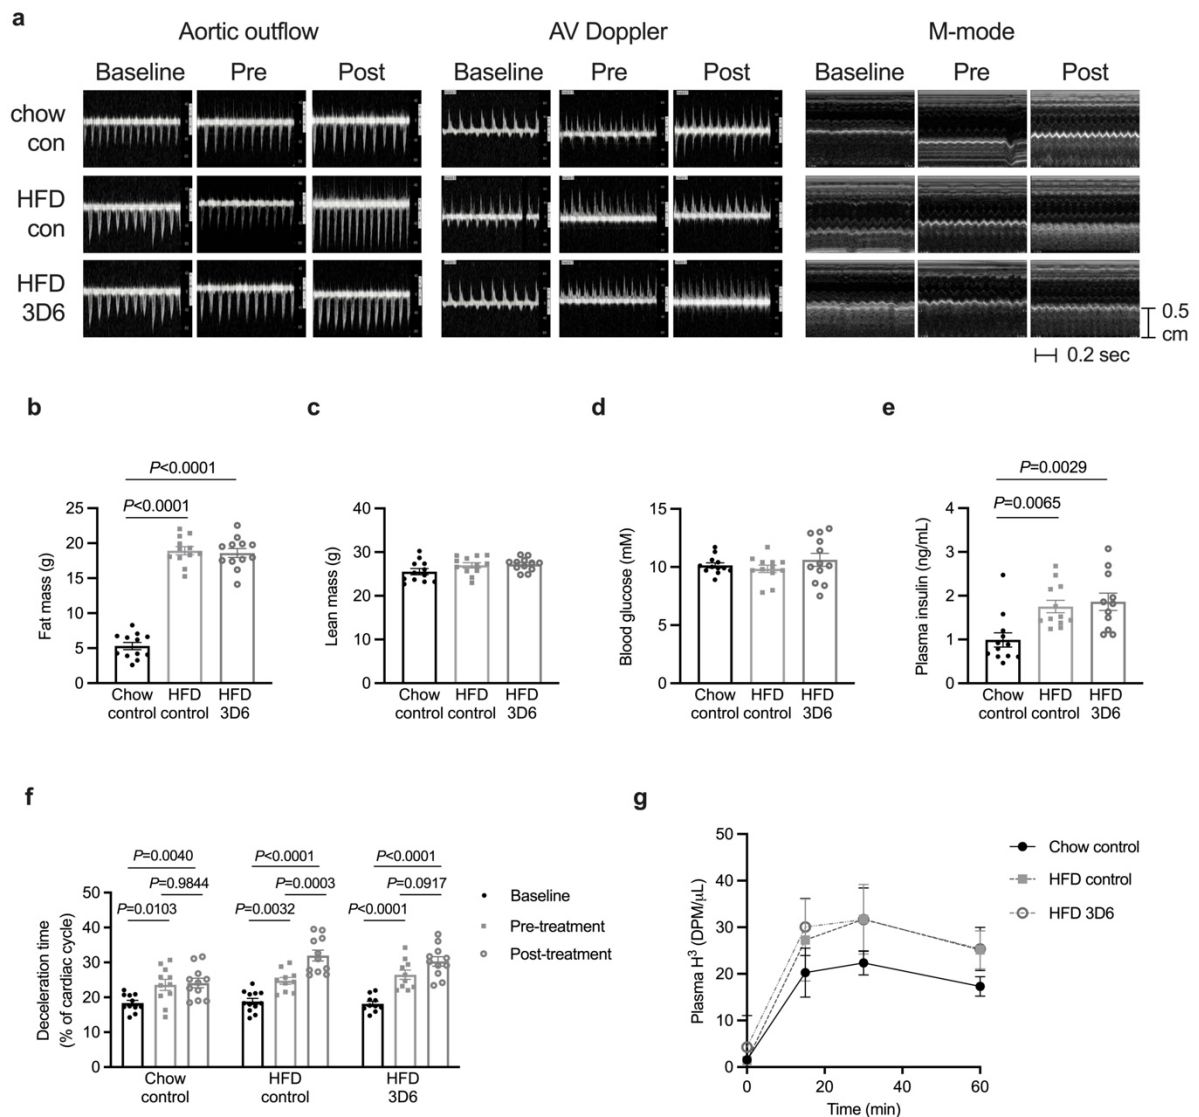

**Supplementary Figure 5: Characterisation of mice fed a high fat diet and administered control or 3D6 antibodies.** **a**, representative echocardiography images; **b**, fat mass (one-way ANOVA ( $P < 0.0001$ ;  $F(2,33) = 177.6$ ) with Sidak's repeated measures test  $P$ .adjusted;  $n=12$ /group); **c**, lean mass ( $n=12$ /group), **d**, fasting blood glucose ( $n=12$ /group); **e**, fasting plasma insulin (Kruskal-Wallis test ( $P = 0.0011$ ;  $\chi^2 = 13.66$ ) with Dunn's repeated measures test  $P$ .adjusted;  $n=12$ , 12 and 11/group respectively). **f**, cardiac deceleration time expressed as a percentage of the cardiac cycle (mixed effects model (time  $P < 0.0001$ ,  $F(2,56) = 56.37$ ; treatment  $P = 0.0044$ ,  $F(2,32) = 6.445$ ; interaction  $P = 0.0145$ ,  $F(4,56) = 3.410$ ) with Sidak's repeated measures test  $P$ .adjusted;  $n=12$ /group); **g**, plasma  $^3\text{H}$  concentration in mice fed regular chow and administered control antibody, or mice fed a high fat diet (HFD) and administered control or 3D6 antibodies ( $n=7$ , 8 and 8/group respectively). All data are mean  $\pm$  SEM. Statistical tests are two-tailed. Source data are provided in the Source Data file.

## Supplementary Figure 6

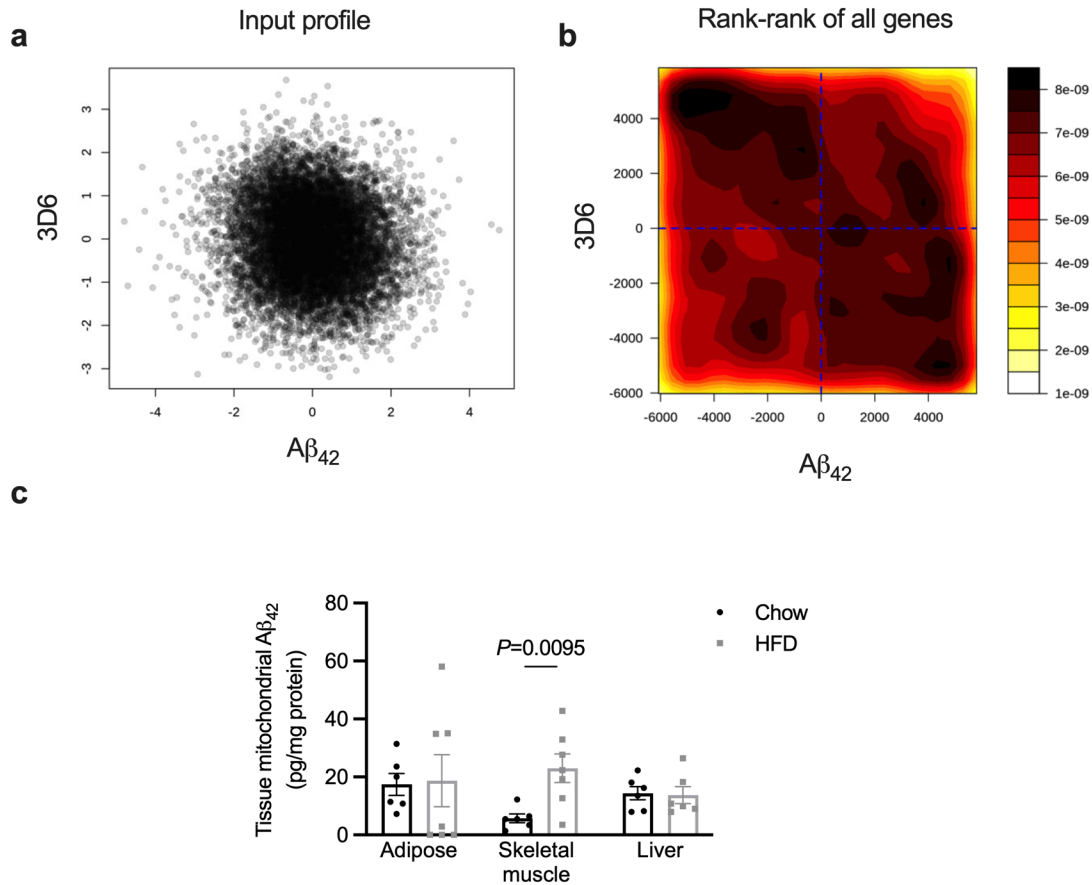

**Supplementary Figure 6: Mechanisms by which  $A\beta_{42}$  has its effects on the heart.** **a**, input profile defined as differential expression score defined as the sign of the fold change multiplied by the  $-\log_{10}(\text{p-value})$ ; **b**, gene ranks from bulk RNA-seq analysis of gene expression in the hearts of mice administered  $A\beta_{42}$  compared with mice administered Scr $A\beta_{42}$  (x-axis) and hearts of mice administered 3D6 antibody compared with mice administered control antibody (y-axis). **c**,  $A\beta_{42}$  in mitochondrial fractions isolated from adipose tissue, skeletal muscle and liver of chow or HFD-fed mice (unpaired t-test;  $n=6$  and  $7/\text{group}$  respectively). All data are mean  $\pm$  SEM. Statistical tests are two-tailed. Source data are provided in the Source Data file.

## Supplementary Figure 7

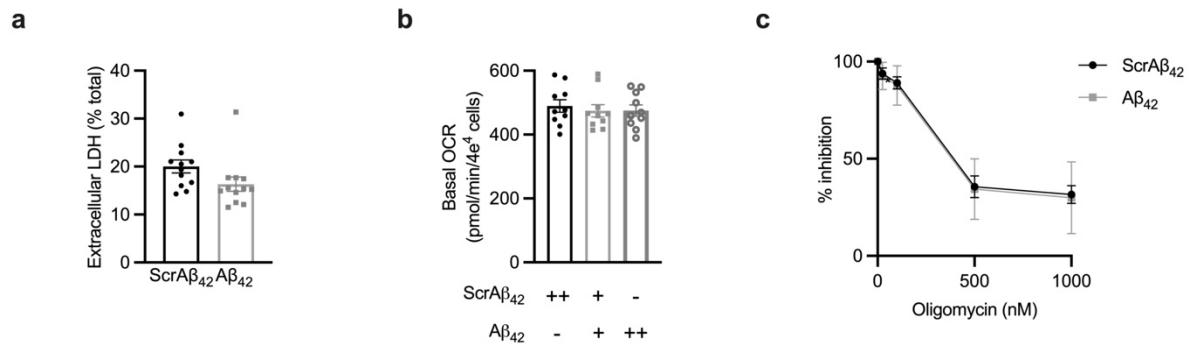

**Supplementary Figure 7: Effect of Aβ<sub>42</sub> on cardiomyocytes.** **a**, extracellular lactate dehydrogenase (LDH) in primary neonatal ventricular cardiomyocytes (NVCM) exposed to ScrAβ<sub>42</sub> or Aβ<sub>42</sub> for 48 hr (n=12 biological replicates/group). **b**, basal oxygen consumption rate (OCR) in FAO hepatocytes exposed to ScrAβ<sub>42</sub> or Aβ<sub>42</sub> (ScrAβ<sub>42</sub> at 300, 100 and 0pM and co-incubated with Aβ<sub>42</sub> at 0, 200 and 300pM) for 48 hrs with glucose and pyruvate as exogenous substrates (n=10 biological replicates/group). **c**, inhibition of respiration in response to increasing concentrations of oligomycin in primary NVCM exposed to ScrAβ<sub>42</sub> or Aβ<sub>42</sub> for 48 hrs (n=5 biological replicates/group). All data are mean ± SEM. Source data are provided in the Source Data file.
